# Supplementary material for: LRRK2 modifies α-syn pathology and spread in mouse models and human neurons
Source: Springer Nature journal article supplement (doi:10.1007/s00401-019-01995-0), 2019-03-29

## Supplementary Material

### Figure Legends – Supplementary Figures

#### **Supplementary Figure 1: Recombinant $\alpha$ -syn PFFs induce aggregation of endogenous $\alpha$ -syn in primary neurons *in vitro*.**

**a** Schematic of lentiviral or PFF-based  $\alpha$ -syn aggregation assay. Primary cortical neurons from E17 mouse embryos were infected with  $\alpha$ -syn expressing lentivirus or treated with 2.6  $\mu$ g/ml sonicated mouse  $\alpha$ -syn PFFs at 10 days in vitro (DIV). Neuronal survival and pSer129- $\alpha$ -syn aggregation was measured 1, 3, 6, 10 days post PFF/lentiviral treatment. **b,c** Neuronal survival was measured using luminescence-based LDH activity assays (**b**) and CaspaseGlo DEVDase assays (**c**) 10 days after lentiviral infection or PFF addition to the culture media. **d,e** Representative images (**d**) and quantification (**e**) of pSer129- $\alpha$ -syn aggregation (green) 3-10 days post PFF treatment. MAP2 (magenta) was used as a marker for neuronal processes (n = 8 wells/time point; 12 images/well). Data expressed as mean + SEM; \*p < 0.05; \*\*p < 0.01; \*\*\*p < 0.001; compared by one-way ANOVA with a Tukey's post-test for multiple comparisons.

#### **Supplementary Figure 2: Characterization and size measurements of sonicated human and mouse $\alpha$ -syn preformed fibrils.**

**a** Representative electron micrographs of sonicated mouse  $\alpha$ -syn preformed fibrils (PFFs). Scale bar, 100 nm. **b** Quantification and distribution of fragment lengths, in 10nm bins. Average fragment length of the mouse PFFs is 50.39 nm. **c** Representative electron micrographs of sonicated human  $\alpha$ -syn PFFs. **d** Quantification and distribution of fragment length, in 10nm bins. The average fragment length of the human PFFs is 50.4 nm.

#### **Supplementary Figure 3: Targeted Lentiviral knockdown of Parkinson's disease risk genes in primary neurons.**

**a-f** Lentivirus-mediated knock-down efficiency was measured using quantitative RT-qPCR analysis. Neurons were infected on 1 day in vitro (DIV) and mRNA was isolated on 10 DIV. 4-5 different shRNA constructs were generated per Parkinson's disease risk gene. Representative knock down efficiency of shRNAs targeting Lrrk2 (**a**), Gba (**b**), Snca (**c**), non-targeting scramble control (**d**), Pink1 (**e**) and Park2 (**f**), normalized to Scramble control (n = 3-4 wells/shRNA). Data expressed as mean + SEM; \*p < 0.05; \*\*p < 0.01; \*\*\*p < 0.001 compared by one-way ANOVA with a Tukey's post-test for multiple comparisons.

#### **Supplementary Figure 4: Characterization and manipulation of Gba and Lrrk2 in primary neurons *in vitro*.**

**a,b** Representative Western blot (**a**) and quantifications (**b**) of lysates from primary neurons infected with Gba, Lrrk2 and non-targeting scramble shRNAs (SCR), collected 9 days post infection. Blots were probed with anti- $\alpha$ -syn, anti-ActB, anti-Lrrk2 and anti-Gba antibodies. ActB was used as a loading control and the data normalized to the scramble condition (n = 4 wells/group). Data expressed as mean + SD. **c** Schematic of experimental design: Primary neurons were isolated from CAG-Cas9 transgenic E17 embryos, infected with Lrrk2 and non-targeting

(NT) gRNAs on 1 DIV and treated with sonicated  $\alpha$ -syn PFF at 10DIV. **d**  $\alpha$ -syn aggregation and viability was measured using pSer129 and NeuN immunolabeling 10 days post fibril treatment (n = 10 wells/group). **e** Relative  $\alpha$ -syn (Snca) mRNA expression level measured in NT and Lrrk2 gRNA infected neurons at 10DIV using quantitative RT-PCR analysis. Data was normalized to the NT condition (n = 6 wells/group) **f** Representative Sanger sequencing chromatogram of the G to A nucleotide mutation in exon 41 of the human LRRK2 in the BAC transgenic mouse line. Mutation marked in red. **g,h** Relative mRNA expression level of the synaptic markers Synaptophysin (**g**) and Snap25 (**h**) in WT compared to LRRK2 G2019S transgenic primary neurons at 10 DIV (n = 6 wells/group). **i,j** Neuronal survival of  $\alpha$ -syn PFF and Vehicle (Veh) treated WT compared to LRRK2-G2019S primary neurons was measured using LDH (**i**) and CaspaseGlo (**j**) luminescence-based activity assays (n = 12 wells/group). **k** Quantification of internalization in G2019S LRRK2 and WT primary neuron cultures after 1-24 hours of incubation with fluorescently labeled sonicated  $\alpha$ -syn PFFs (n = 4 wells, 112-145 cells/well). Data expressed as mean + SEM; \*p < 0.05; compared by unpaired Student's t-test and one-way ANOVA with a Tukey's post-test for multiple comparisons and two-way ANOVA with Bonferroni post hoc correction.

### **Supplementary Figure 5: Recombinant $\alpha$ -syn PFF delivery induce aggregation of endogenous $\alpha$ -syn in the brain of adult wildtype mice.**

**a** Experimental design: adult wildtype (WT) mice were stereotaxically injected with recombinant mouse  $\alpha$ -syn PFFs or vehicle control (Veh) into the dorsal striatum, followed by behavioral testing and histological analysis up to 6 months post injection (PI). **b** Representative images of pSer129-positive (green) and p62-positive (red)  $\alpha$ -syn aggregates and DAPI (blue) in the dorsal striatum 6 months post PFF injection. **c** Schematic of coronal brain section with motor cortex and representative confocal image of Thioflavin S staining (ThioS, green) and pSer129 immunolabeling (red). Scale bar, 100  $\mu$ m. **d** Schematic of coronal brain section with Striatum and representative confocal image of Thioflavin S staining and pSer129 immunolabeling. Scale bar, 50  $\mu$ m. **e** Schematic of coronal brain section with Amygdala and representative confocal image of Thioflavin S staining and pSer129 immunolabeling. Scale bar, 100  $\mu$ m. **f** Schematic of coronal brain section with Substantia nigra pars compacta (SNpc) and representative confocal image of Thioflavin S staining and pSer129 immunolabeling. Scale bar, 100  $\mu$ m.

### **Supplementary Figure 6: Intra-striatal delivery of PFF triggers $\alpha$ -syn pathology, degeneration of dopaminergic neurons and changes in open field behavior assays.**

**a** Schematic of a coronal mouse brain section with the substantia nigra pars compacta highlighted (gray). **b** Representative images of pSer129-positive aggregates (green) in TH-positive (red) dopaminergic neurons in the SNpc 2 months post PFF injection (PI). **c** Quantification of percentage of TH-positive neurons with pSer129-positive inclusions (n = 8-12 animals/group). **e** Representative images of TH-positive (red) dopaminergic neurons in SNpc ipsilateral and contralateral to the injection site at 2 and 6 months post injection with PFFs. **e,f** Quantification of TH-positive neurons in the SNpc of PFF (**e**) and vehicle control (**f**) injected animals (n = 6-12 animals/group, 8-10 sections/animal). Black bars indicated the number of TH-positive neurons ipsilateral to the injection site, gray bars contralateral to the injection site. Data expressed as mean + SD. **g-i** Behavioral testing of PFF and vehicle control injected mice up to 6 months post injection. **g** Rotarod test measured the latency to fall from an accelerating rotating cylinder (n = 10-12 animals/group). **h** Open field measures anxiety using the time spent in the center and the overall



distance travelled (n = 10-12 animals/group). Data expressed as mean + SEM; \*p < 0.05; compared by Student's t-test, one-way ANOVA with a Tukey's post-test for multiple comparisons or two-way ANOVA with Bonferroni post hoc correction.

### **Supplementary Figure 7: Characterization of G2019S LRRK2 BAC transgenic mice.**

**a** Schematic illustrating the two mouse genotypes characterized: LRRK2 G2019S BAC transgenic mice and WT littermate controls. **b** Representative Western blot of striatal brain lysates from LRRK2 G2019S-BAC transgenic (G2019S or GS) mice and WT littermate controls were probed with anti-human LRRK2, anti- $\alpha$ -syn and anti-ActB antibodies. ActB was used as loading control. **c** Quantification  $\alpha$ -syn protein level in G2019S-LRRK2 BAC transgenic mice and WT littermate controls (n = 4 animals/group). **d** qRT-PCR expression analysis of  $\alpha$ -syn mRNA level in 2 months old G2019S-LRRK2 BAC transgenic mice and WT littermate controls (n = 4 animals/group). **e** Rotarod behavioral assay measuring the latency to fall from an accelerating rotating cylinder for 2, 6, 12 months old G2019S-LRRK2 BAC transgenic mice and WT littermate controls (n = 12-15/group). **f** Body weight measurements of 2 to 12 months old G2019S-LRRK2 BAC transgenic mice and WT littermate controls (n = 20-25 animals/group). Data expressed as mean + SEM or mean + SD; n.s., p > 0.05; compared by Student's t-test, one-way ANOVA with a Tukey's post-test for multiple comparisons and two-way ANOVA with Bonferroni post hoc correction.

### **Supplementary Figure 8: $\alpha$ -syn aggregation pathology is exacerbated in LRRK2 G2019S BAC transgenic mice injected with $\alpha$ -syn preformed fibrils.**

**a** Schematic representation of analyzed brain area, representative images and quantification of  $\alpha$ -syn pSer129 labeling in the dorsal Striatum at 1, 3 and 6 months post injection with  $\alpha$ -syn PFFs or vehicle (Veh) control into LRRK2 G2019S mutant (G2019S or GS) and wildtype (WT) littermate control mice (n = 6-12 animals/group). Scale bar, 200  $\mu$ m. **b** Schematic representation of brain area, representative images and quantification of  $\alpha$ -syn pSer129 labeling in the motor cortex at 1, 3 and 6 months post injection with  $\alpha$ -syn PFFs or vehicle control into LRRK2 G2019S and WT mice. (n = 6-12 animals/group). Scale bar, 250  $\mu$ m. **c** Schematic representation of brain area, representative images and quantification of  $\alpha$ -syn pSer129 labeling in the basolateral Amygdala at 1, 3 and 6 months post injection with  $\alpha$ -syn PFFs or vehicle control into LRRK2 G2019S and WT mice. (n = 6-12 animals/group). Scale bar, 200  $\mu$ m. All images from 3 months post injection time point. Data expressed as mean + SEM; \*p < 0.05; compared by Student's t-test, one-way ANOVA with a Tukey's post-test for multiple comparisons.

### **Supplementary Figure 9: Rapid differentiation and upregulation of synaptic and mature neuron markers using a Ngn2-based induced neuron approach.**

**a** Bright field images of undifferentiated iPS colonies and induced neurons (iNs) after two weeks of differentiation *in vitro*. Schematic and time-line of Ngn2-based differentiation protocol. iPS cells differentiate rapidly into iNs following Ngn2 expression and transition into neuronal differentiation media. **b,c** Representative images of iNs expressing neuronal markers B-III-tubulin (**b**) and MAP2 (**c**). **d** qRT-PCR analysis of human endogenous  $\alpha$ -syn (SNCA) mRNA expression in iPS control lines during 4 weeks of iN differentiation (n = 4 iPS lines/time point). Data normalized to 0 weeks of differentiation. **e** Representative Western blot of lysates from iNs up to 4 week of differentiation probed with anti- $\alpha$ -Syn and anti-ACTB antibodies. ACTB was used as a loading control. **f-i** RT-qPCR expression analysis of mature neuron markers MAP2 (**f**) MAPT (**g**)

and synaptic markers SNAP25 (**h**) and GRIA1 (**i**) during 4 weeks of iN differentiation (n = 4 iPS lines/time point). Data normalized to the 0 weeks of differentiation time point. Data expressed as mean + SEM.

**Supplementary Figure 10: Survival analysis of PD-patient derived isogenic LRRK2 G2019S and knock-out iNs.**

**a** Representative Sanger sequencing chromatogram of the G to A nucleotide mutation in exon 1 of LRRK2 in G2019S LRRK2 mutant (top) and healthy control (bottom) iPS lines. **b,c** Neuronal survival of isogenic G2019S LRRK2 mutant (G2019S), corrected and LRRK2 knock-out (KO) iNs was measured after 4 weeks of differentiation using LDH (**b**) and CaspaseGlo DEVDase (**c**) luminescence-based activity assays (n = 12 wells/line/time point). Data expressed as mean + SD; n.s., p>0.05; compared by one-way ANOVA with a Tukey's post-test for multiple comparisons.

# Supplementary Figure 1

**a**

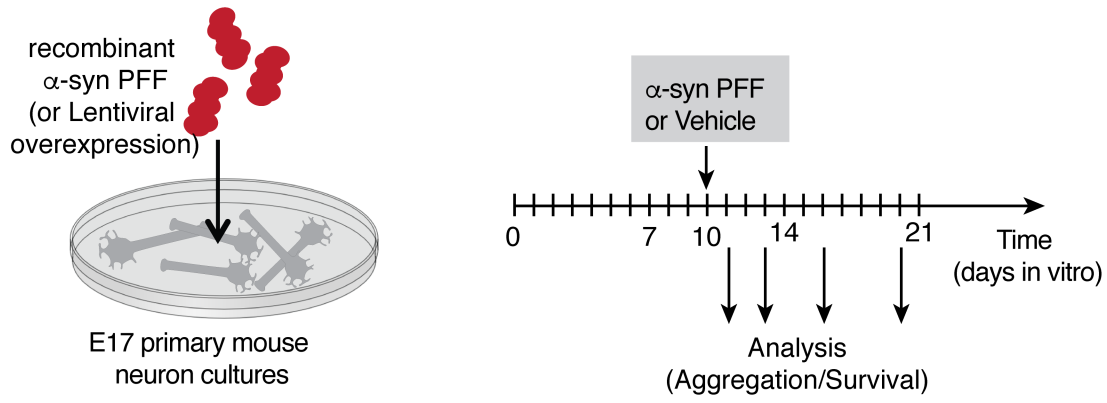

**b**

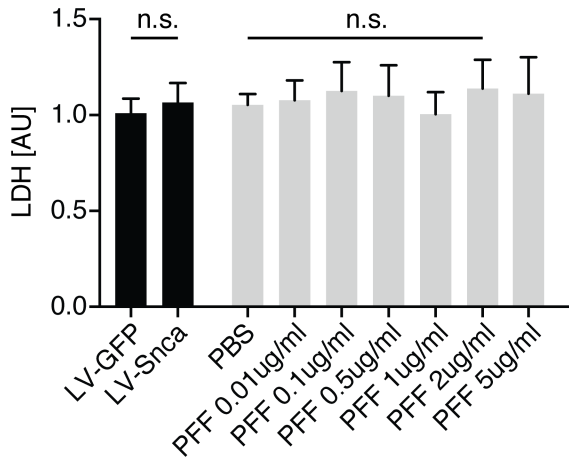

**c**

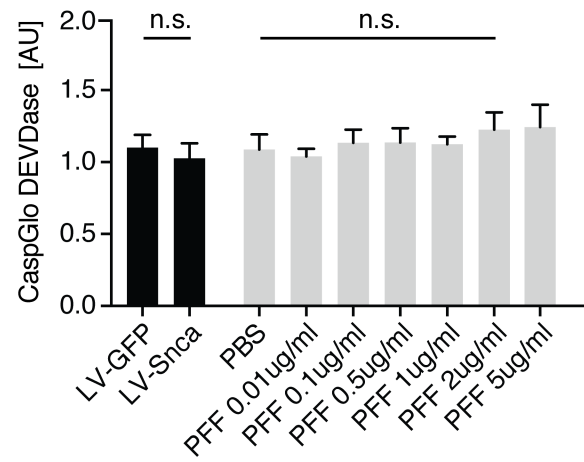

**d**

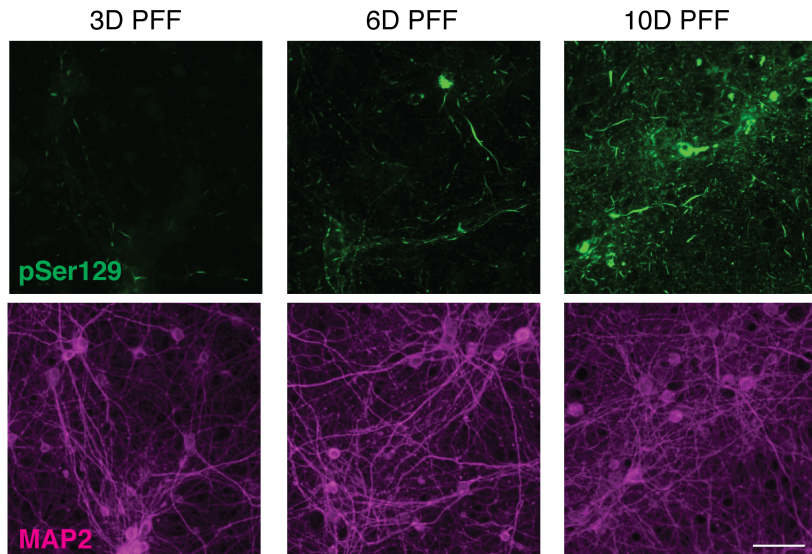

**e**

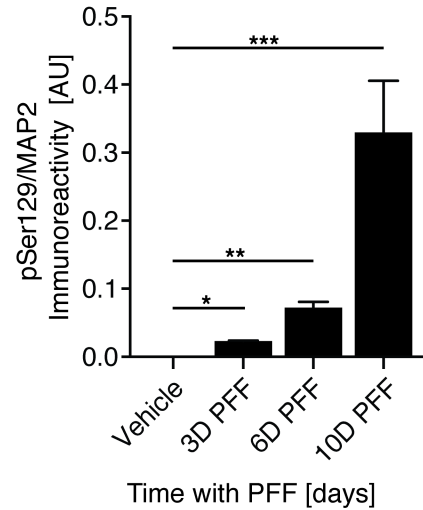

# Supplementary Figure 2

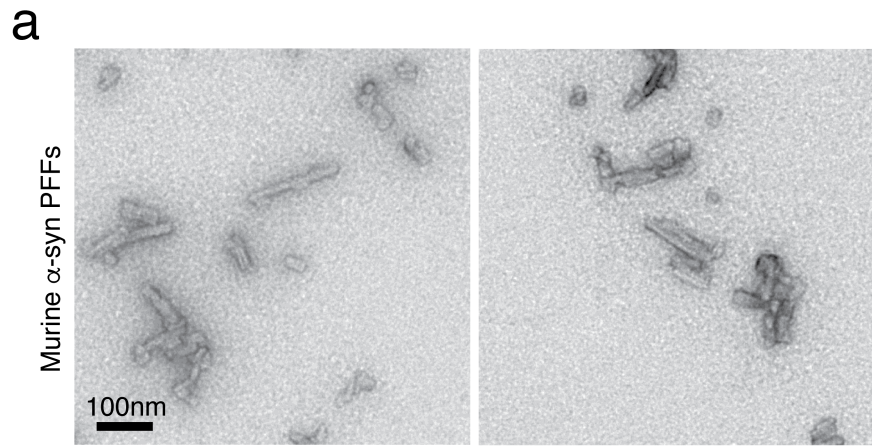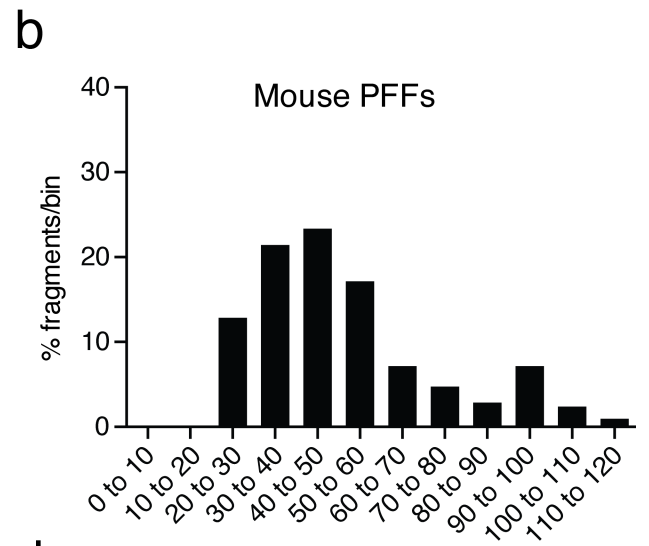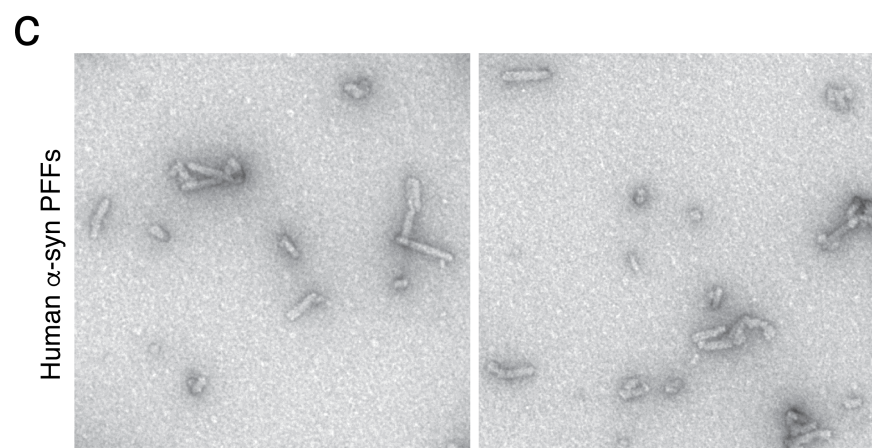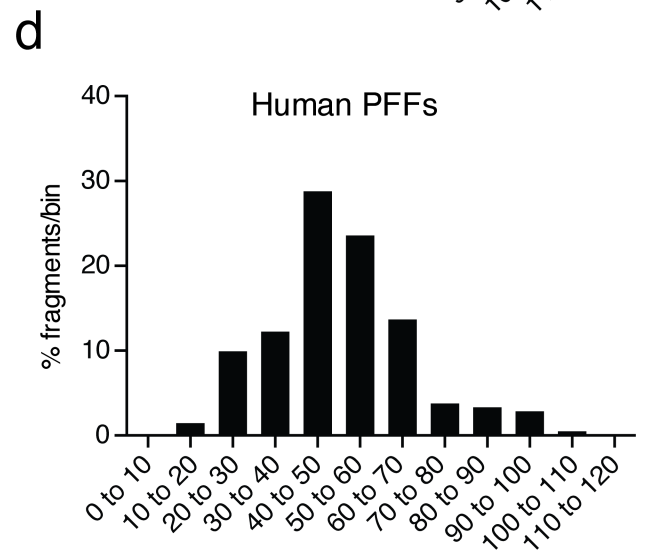

# Supplementary Figure 3

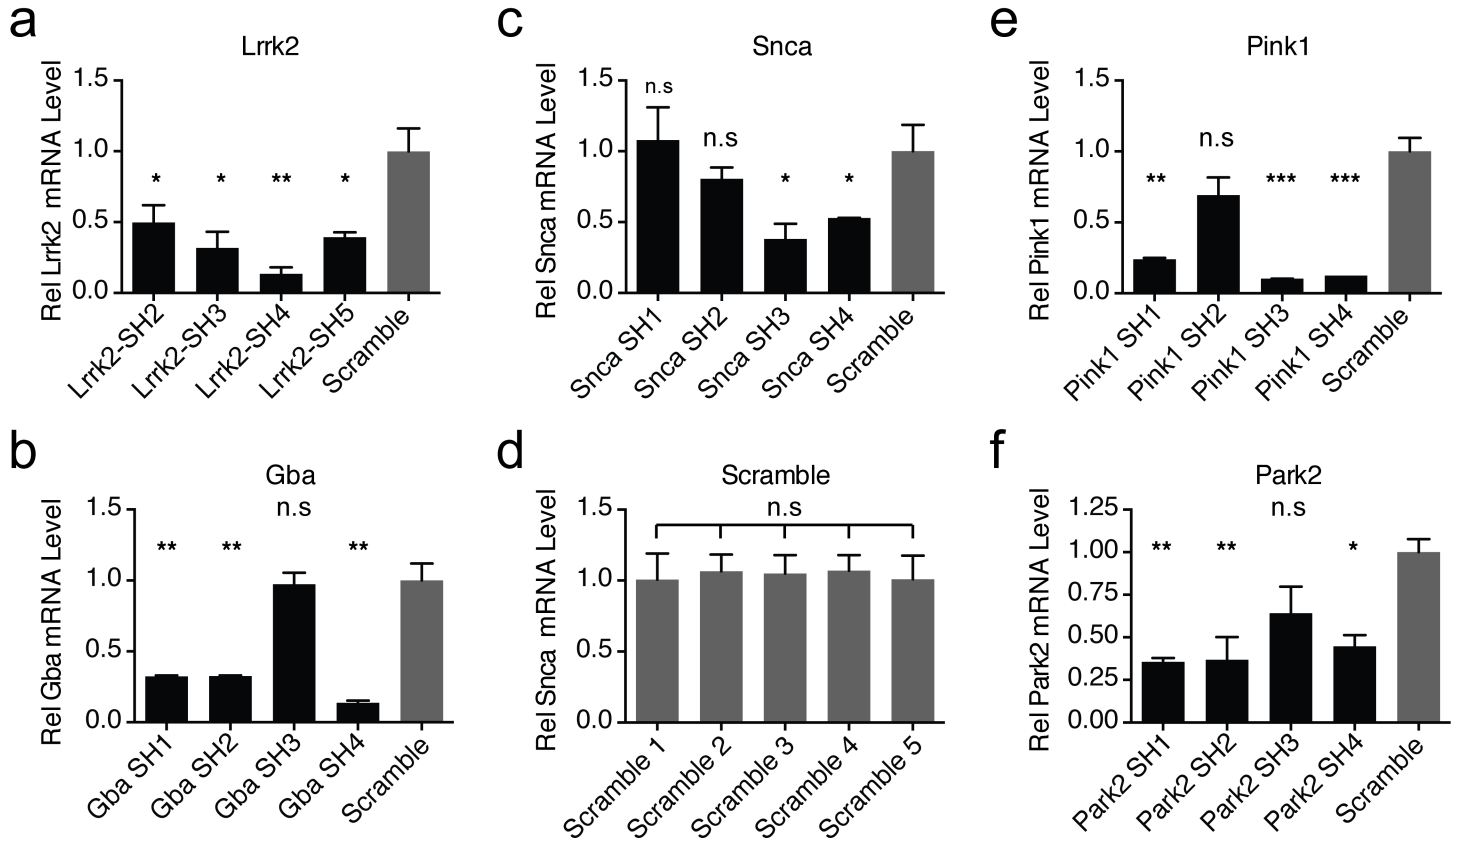

# Supplementary Figure 4

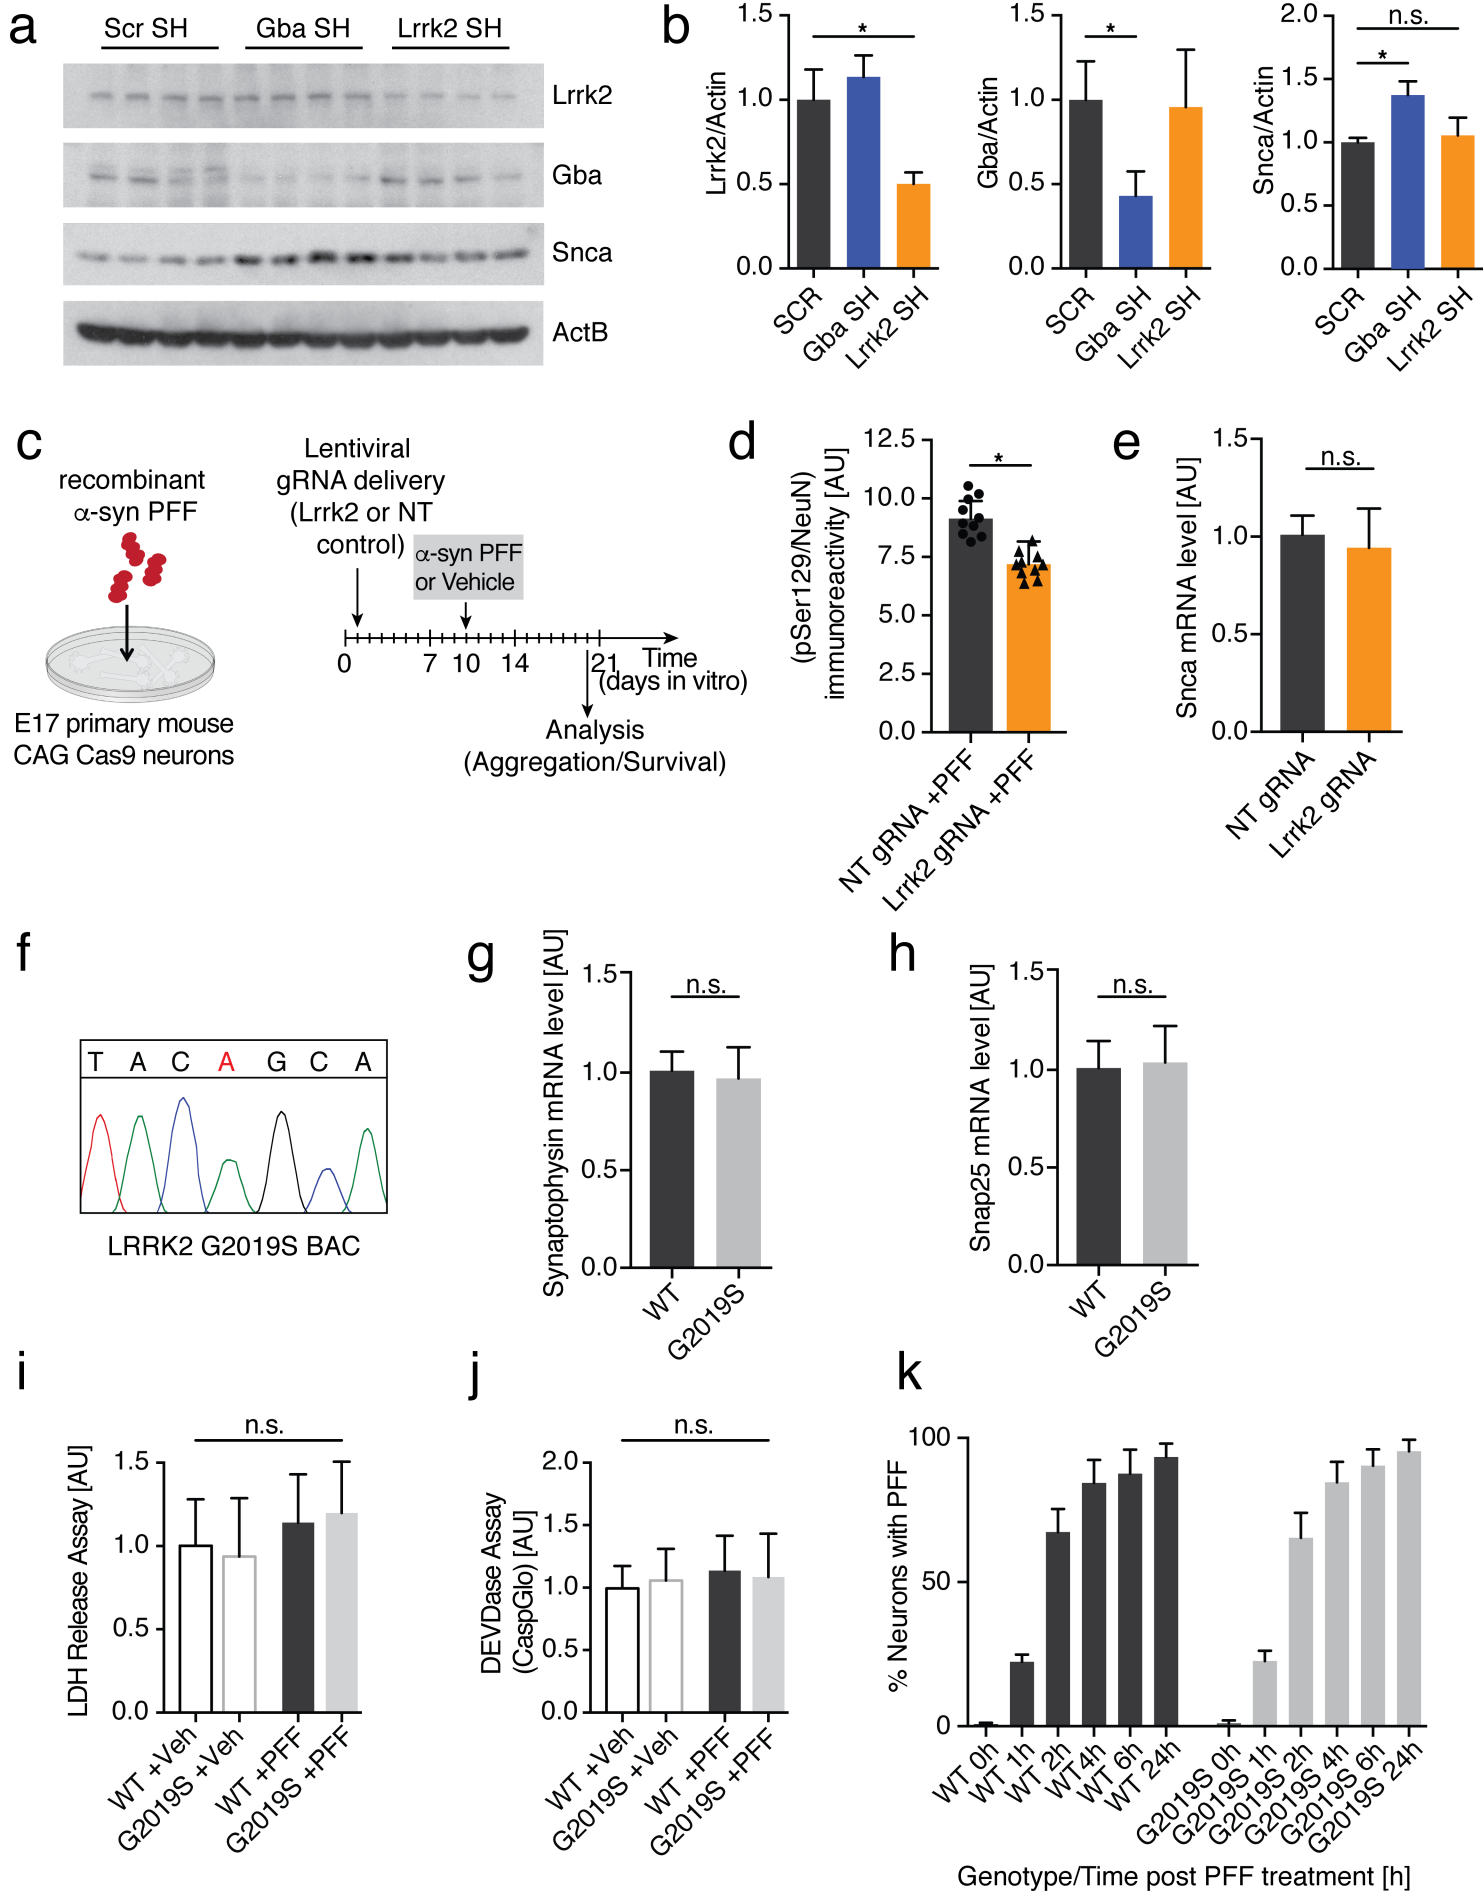



# Supplementary Figure 5

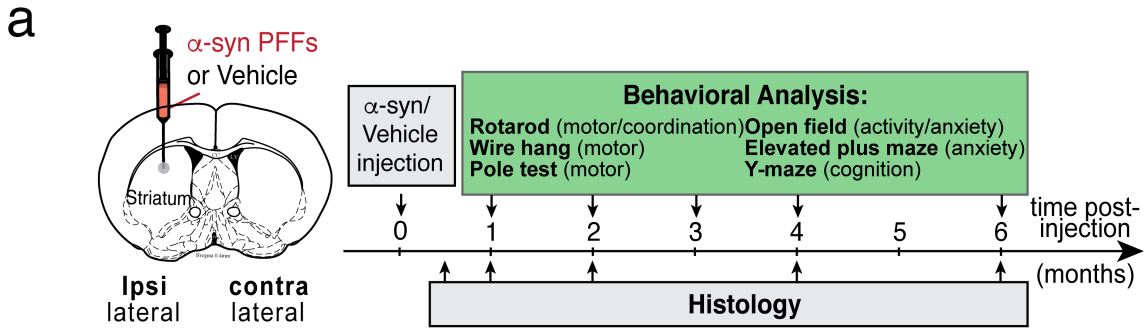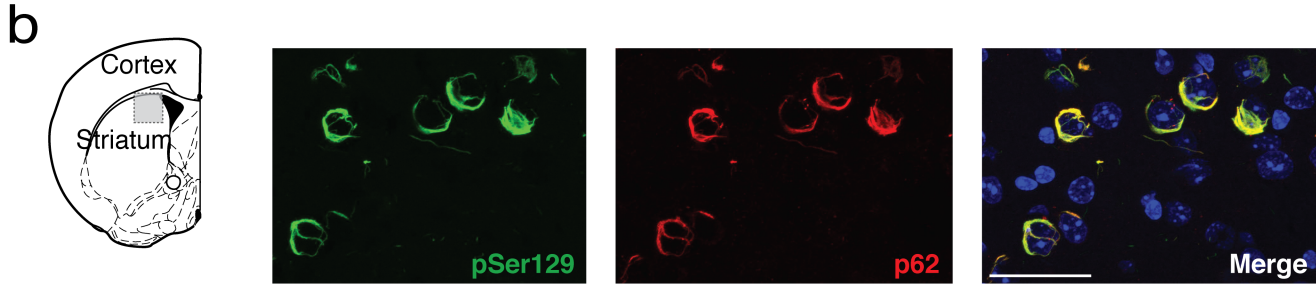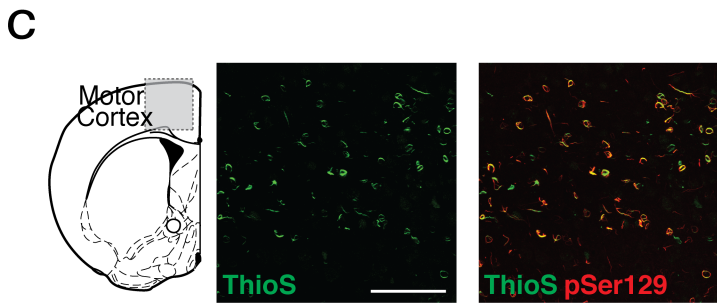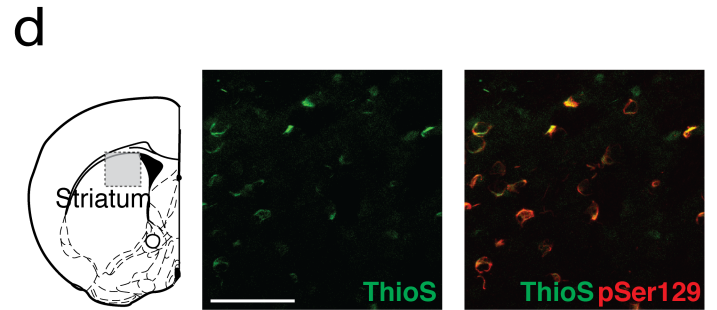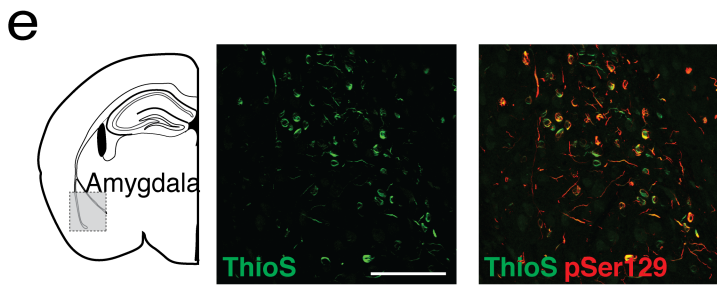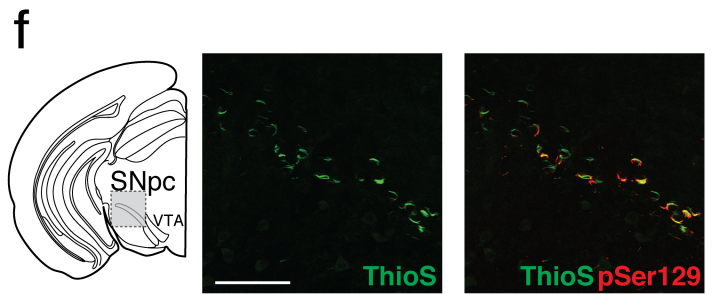

Supplementary Figure 6

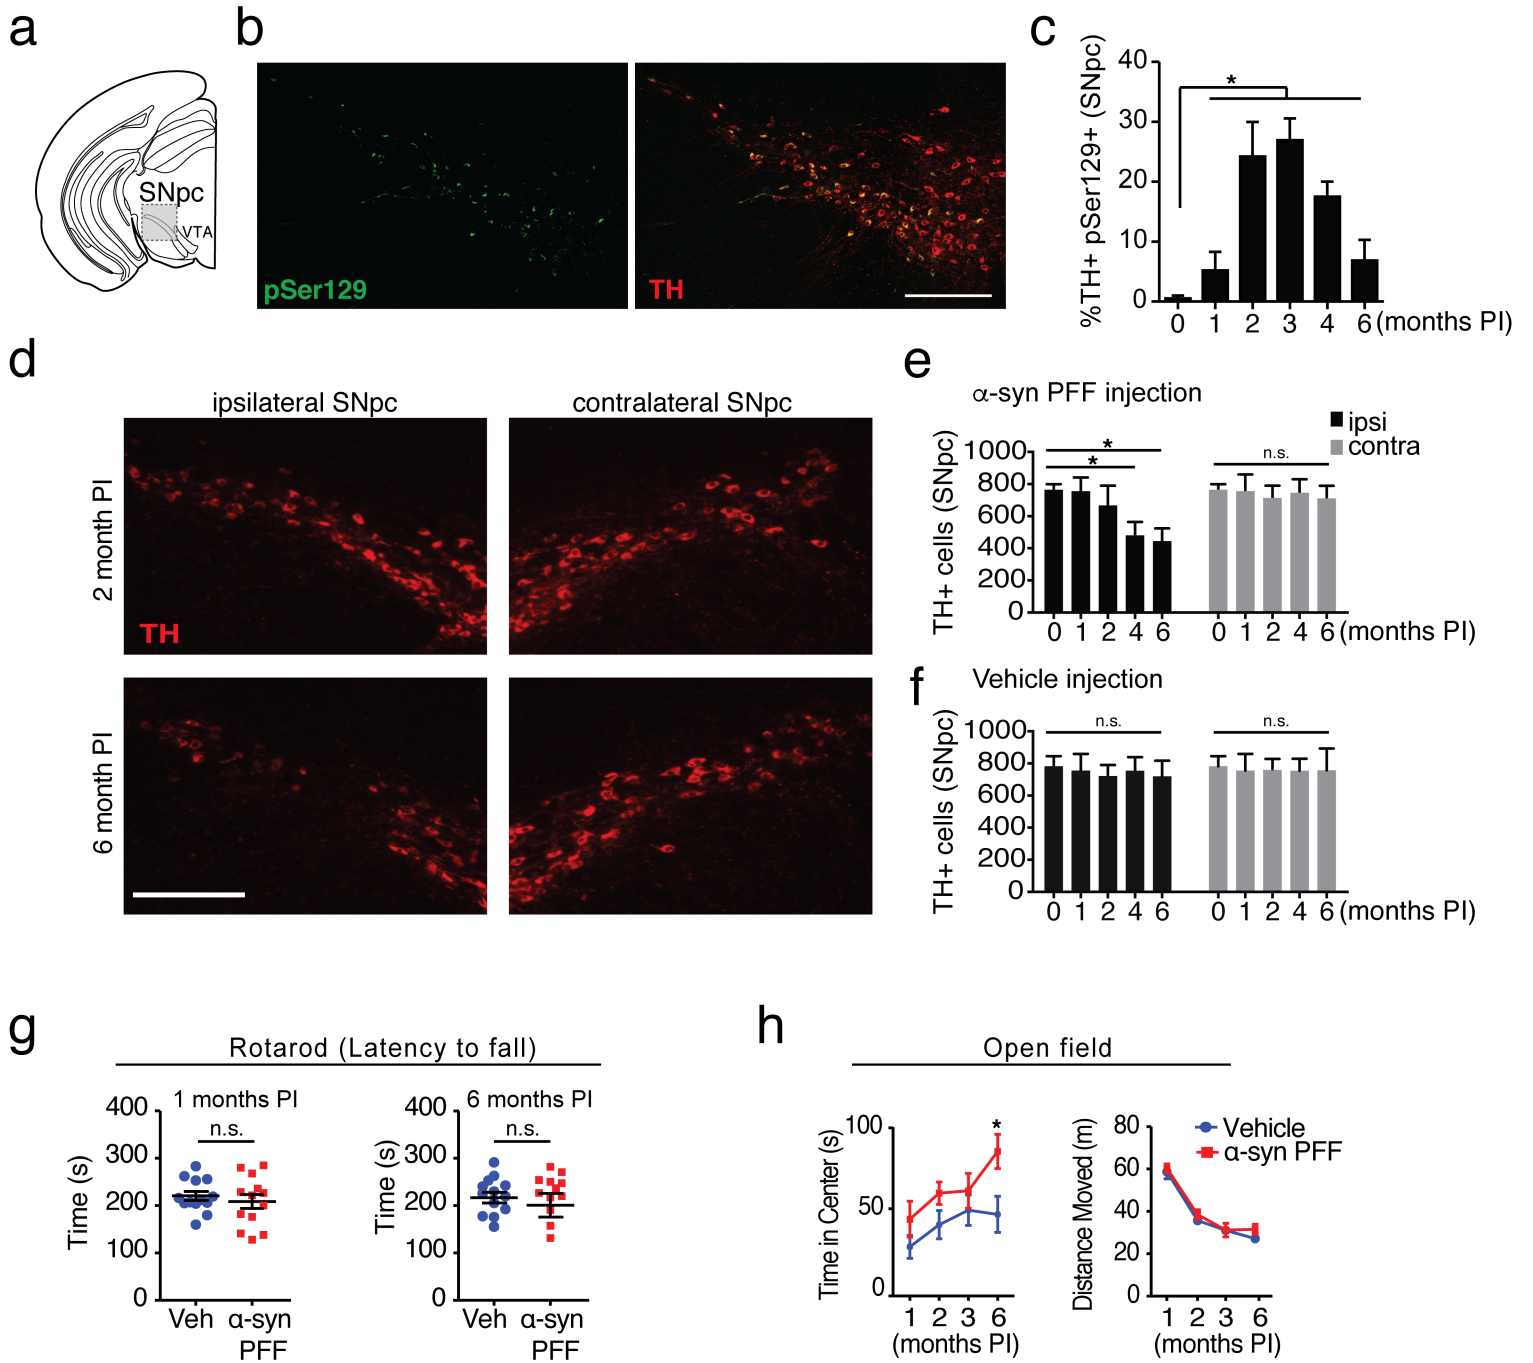



Supplementary Figure 7

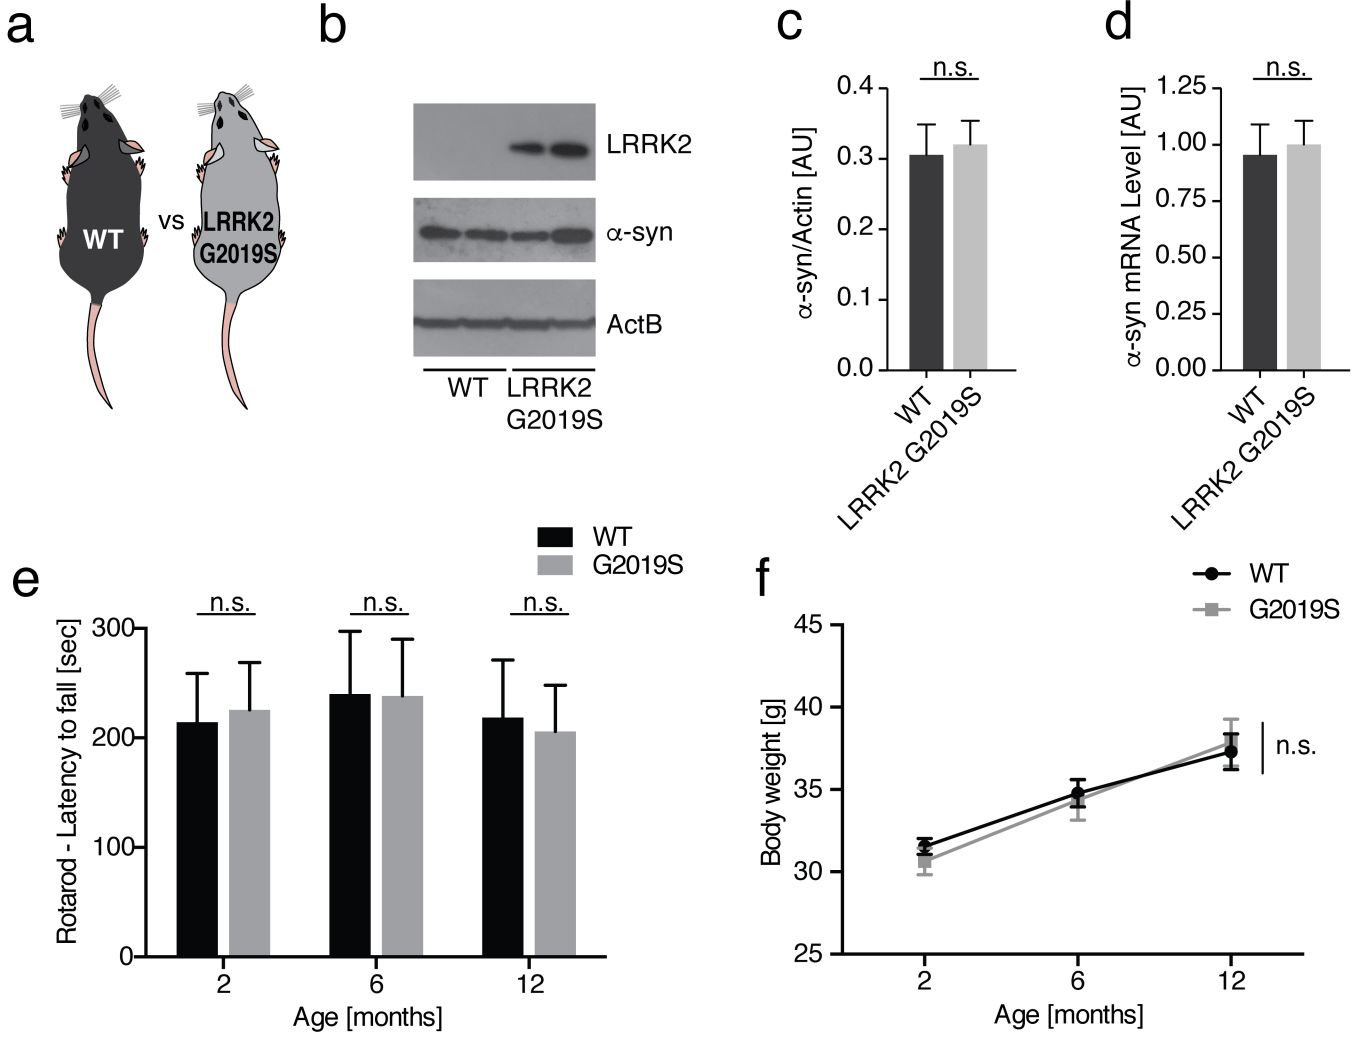

# Supplementary Figure 8

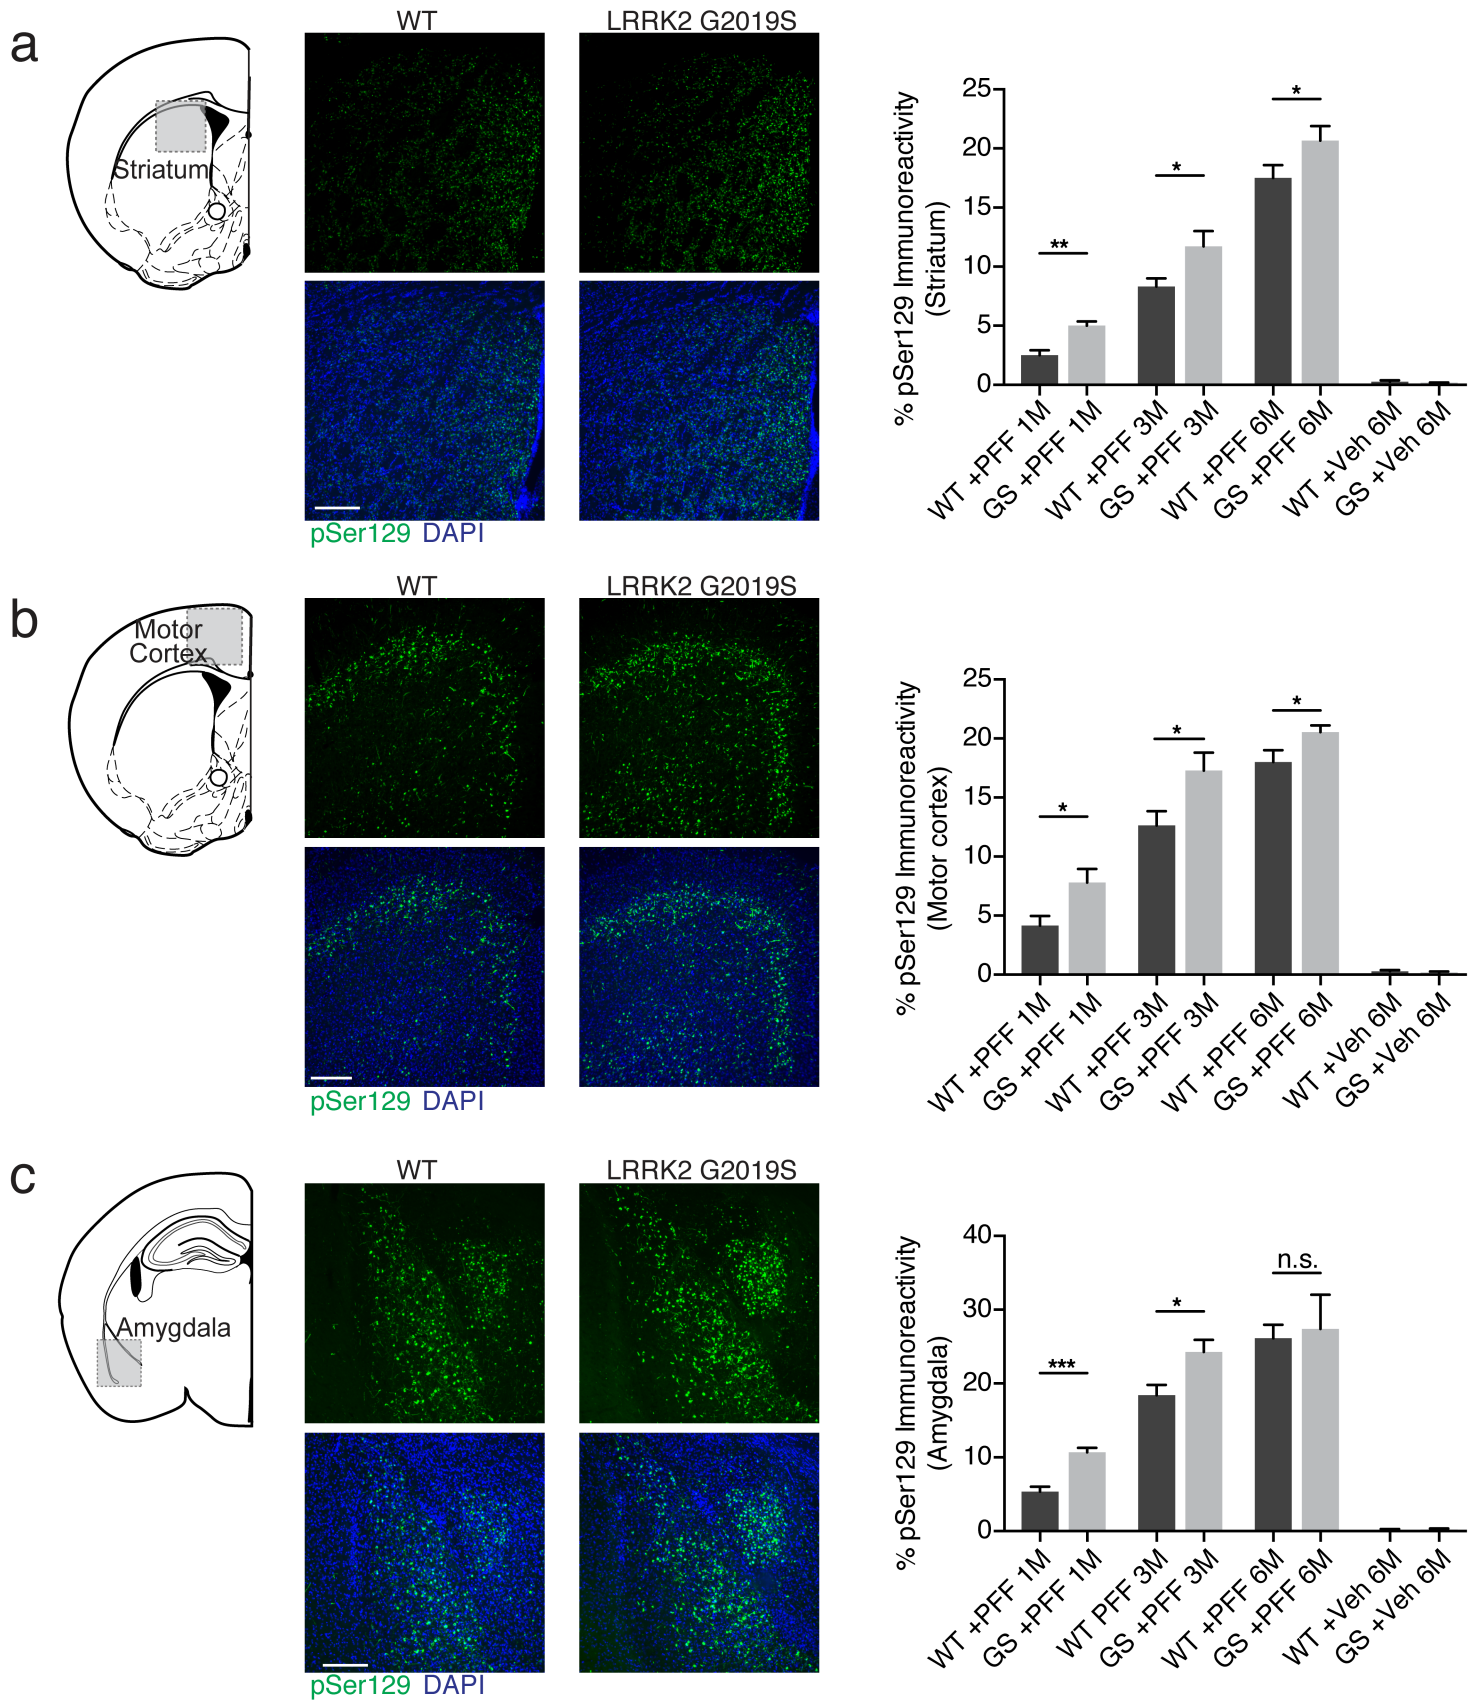

# Supplementary Figure 9

**a**

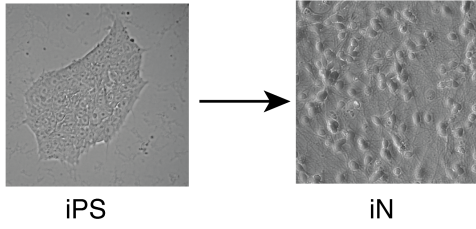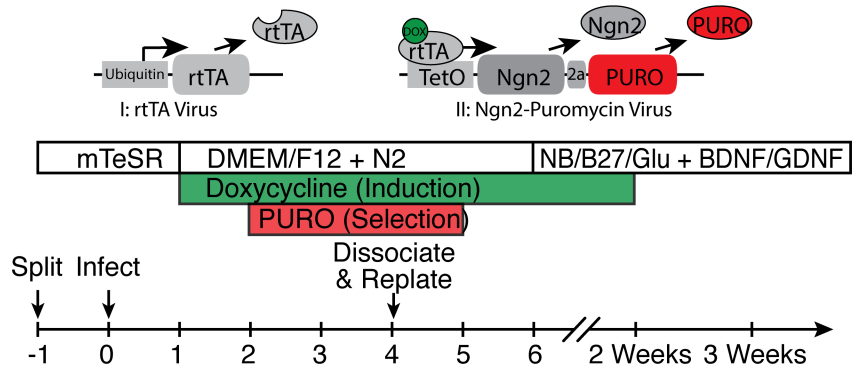

**b**

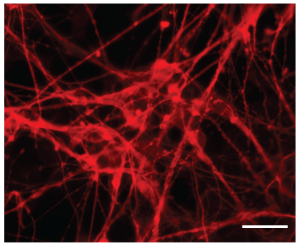

BIII-tubulin

**c**

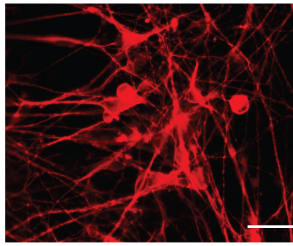

MAP2

**d**

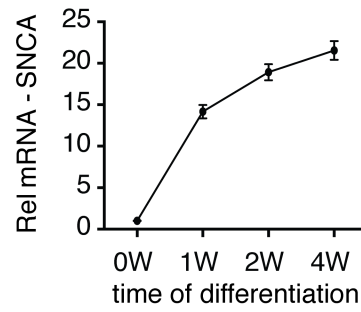

**e**

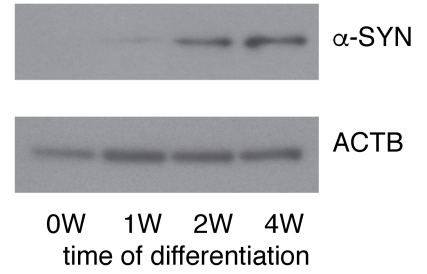

**f**

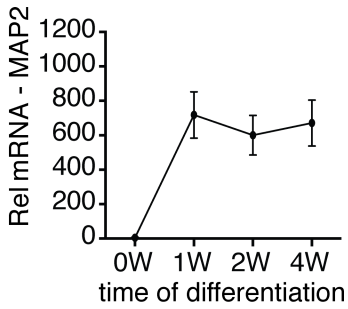

**g**

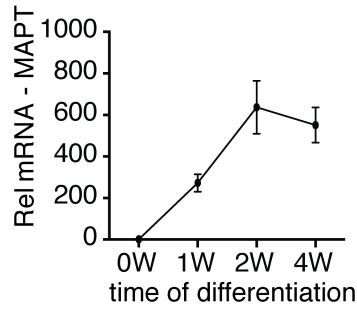

**h**

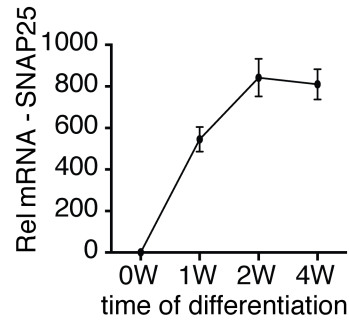

**i**

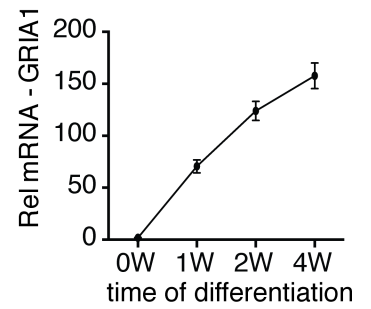

# Supplementary Figure 10

**a**

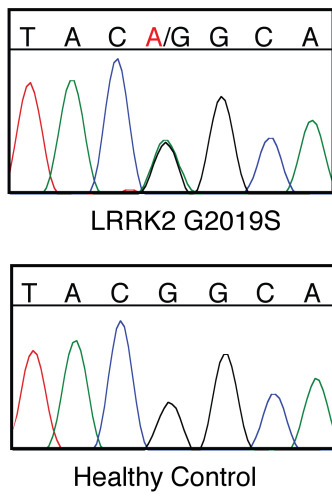

**b**

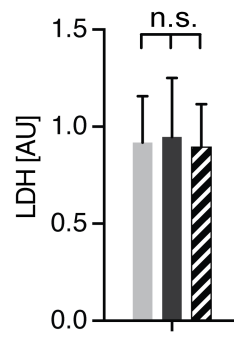

**c**

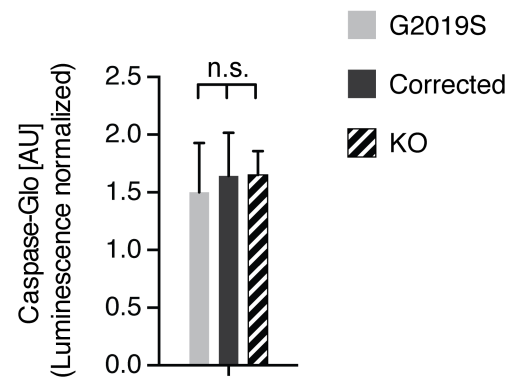

Supplement: MOESM1 [file 16584756]
